# Supplementary material
Source: PubMed Central journal article supplement (PMC7964899)
Supplement: 3251_table.pdf [file 3251_table.pdf]

**On-line Table: Imaging findings in patients who had postoperative MRI**

| Type of Surgery | Time from Surgery (hours) |        | Lesions Seen? |      | DWI Lesion Characteristics |                   |      | HARM Characteristics                |                                   |
|-----------------|---------------------------|--------|---------------|------|----------------------------|-------------------|------|-------------------------------------|-----------------------------------|
|                 | To Gd                     | To MRI | DWI           | HARM | No.                        | Location          | Type | Location                            | Severity                          |
| Group 1         |                           |        |               |      |                            |                   |      |                                     |                                   |
| OPCABG          | 23.0                      | 46.9   | Yes           | No   | 4                          | 3 Co, 1 SC        | P    |                                     |                                   |
| OPCABG          | 23.0                      | 47.2   | No            | No   | 0                          |                   |      |                                     |                                   |
| OPCABG          | 21.5                      | 45.4   | Yes           | Yes  | 2                          | 2 SC              | P    | Background                          | Mild/moderate                     |
| AoVR            | 20.4                      | 92.8   | Yes           | Yes  | 3                          | 3 Co              | P    | Background                          | Mild/moderate                     |
| CABG            | 21.5                      | 45.7   | No            | Yes  | 0                          |                   |      | Background                          | Mild/moderate                     |
| OPCABG          | 22.1                      | 46.3   | Yes           | Yes  | 2                          | 1 Co, 2 SC        | P    | Background                          | Mild/moderate                     |
| OPCABG          | 19.7                      | 44.1   | Yes           | Yes  | 4                          | 3 Co, 1 SC        | P, C | Sulcal<br>Background<br>Ventricular | Severe<br>Severe<br>Mild/moderate |
| MiVR            | 20.8                      | 49.3   | Yes           | No   | 2                          | 2 C               | P    |                                     |                                   |
| CABG            | 22.9                      | 50.2   | Yes           | Yes  | 6                          | 2 Co, 4 Ce        | P, C | Sulcal Background                   | Severe, Mild/moderate             |
| Group 2         |                           |        |               |      |                            |                   |      |                                     |                                   |
| CABG            | 69.1                      | 69.1   | Yes           | No   | 3                          | 2 SC, 1 Ce        | P    |                                     |                                   |
| OPCABG          | 95.6                      | 95.6   | Yes           | No   | 6                          | 2 Co, 3 SC, 1 Ce  | P, C |                                     |                                   |
| CABG            | 64.9                      | 64.9   | Yes           | No   | 5                          | 5 Co, 1 SC        | P    |                                     |                                   |
| CABG            | 76.3                      | 76.3   | No            | No   | 0                          |                   |      |                                     |                                   |
| CABG            | 118.7                     | 118.7  | Yes           | No   | 13                         | 2 Co, 9 SC, 2 Ce  | P    |                                     |                                   |
| MiVR            | 124.8                     | 124.8  | Yes           | Yes  | 18                         | 14 Co, 1 SC, 3 Ce | P, C | Sulcal                              | Mild/moderate                     |
| MiVR            | 73.0                      | 73.0   | No            | Yes  | 0                          |                   |      | Sulcal                              | Mild/moderate                     |
| AoVR            | 97.8                      | 97.8   | Yes           | Yes  | 7                          | 6 Co, 1 Ce        | P    | Sulcal                              | Mild/moderate                     |
| MiVR            | 69.4                      | 69.4   | No            | No   | 0                          |                   |      |                                     |                                   |
| CABG            | 91.1                      | 91.1   | Yes           | No   | 1                          | 1 Co              | P    |                                     |                                   |

**Note:**—AoVR indicates aortic valve replacement; C, confluent; CABG, coronary artery bypass grafting; Ce, cerebellar; Co, cortical; Gd, gadolinium; HARM, hyperintense acute reperfusion marker; MiVR, mitral valve replacement; OPCABG, off-pump coronary artery bypass grafting; P, punctate; SC, subcortical.
